# Supplementary material
Source: publisher figshare collection journal article supplement (https://frontiersin.figshare.com/ndownloader/files/12268814)
Supplement: Supplementary file [file 12268814]

## Appendix1: MEDLINE search strategy

MEDLINE 1946 to 2015 (& Medline In Process) via Ovid Online (accessed 18<sup>th</sup> August 2015)

Search Strategy:

| # | Searches                                                                                                                                                                                                                                         |
|---|--------------------------------------------------------------------------------------------------------------------------------------------------------------------------------------------------------------------------------------------------|
| 1 | PID.mp. [mp=title, abstract, original title, name of substance word, subject heading word, keyword heading word, protocol supplementary concept word, rare disease supplementary concept word, unique identifier]                                |
| 2 | Primary immunodeficienc*.mp. [mp=title, abstract, original title, name of substance word, subject heading word, keyword heading word, protocol supplementary concept word, rare disease supplementary concept word, unique identifier]           |
| 3 | Primary antibody deficienc*.mp. [mp=title, abstract, original title, name of substance word, subject heading word, keyword heading word, protocol supplementary concept word, rare disease supplementary concept word, unique identifier]        |
| 4 | common variable immune deficienc*.mp. [mp=title, abstract, original title, name of substance word, subject heading word, keyword heading word, protocol supplementary concept word, rare disease supplementary concept word, unique identifier]  |
| 5 | CVID.mp. [mp=title, abstract, original title, name of substance word, subject heading word, keyword heading word, protocol supplementary concept word, rare disease supplementary concept word, unique identifier]                               |
| 6 | x linked agammaglobulinaemia.mp. [mp=title, abstract, original title, name of substance word, subject heading word, keyword heading word, protocol supplementary concept word, rare disease supplementary concept word, unique identifier]       |
| 7 | XLA.mp. [mp=title, abstract, original title, name of substance word, subject heading word, keyword heading word, protocol supplementary concept word, rare disease supplementary concept word, unique identifier]                                |
| 8 | (deficien* adj3 specific antibod*).mp. [mp=title, abstract, original title, name of substance word, subject heading word, keyword heading word, protocol supplementary concept word, rare disease supplementary concept word, unique identifier] |

|    |                                                                                                                                                                                                                                                                |
|----|----------------------------------------------------------------------------------------------------------------------------------------------------------------------------------------------------------------------------------------------------------------|
| 9  | (primary adj3 antibod*).mp. [mp=title, abstract, original title, name of substance word, subject heading word, keyword heading word, protocol supplementary concept word, rare disease supplementary concept word, unique identifier]                          |
| 10 | (primary adj3 immune).mp. [mp=title, abstract, original title, name of substance word, subject heading word, keyword heading word, protocol supplementary concept word, rare disease supplementary concept word, unique identifier]                            |
| 11 | (primary adj3 immunodeficien*).mp. [mp=title, abstract, original title, name of substance word, subject heading word, keyword heading word, protocol supplementary concept word, rare disease supplementary concept word, unique identifier]                   |
| 12 | (antibod* adj3 deficien*).mp. [mp=title, abstract, original title, name of substance word, subject heading word, keyword heading word, protocol supplementary concept word, rare disease supplementary concept word, unique identifier]                        |
| 13 | ig* deficien*.mp. [mp=title, abstract, original title, name of substance word, subject heading word, keyword heading word, protocol supplementary concept word, rare disease supplementary concept word, unique identifier]                                    |
| 14 | PID.mp. [mp=title, abstract, original title, name of substance word, subject heading word, keyword heading word, protocol supplementary concept word, rare disease supplementary concept word, unique identifier]                                              |
| 15 | X-SCID.mp. [mp=title, abstract, original title, name of substance word, subject heading word, keyword heading word, protocol supplementary concept word, rare disease supplementary concept word, unique identifier]                                           |
| 16 | Combined immunodeficiencies.mp. [mp=title, abstract, original title, name of substance word, subject heading word, keyword heading word, protocol supplementary concept word, rare disease supplementary concept word, unique identifier]                      |
| 17 | X-linked severe combined immunodeficiency.mp. [mp=title, abstract, original title, name of substance word, subject heading word, keyword heading word, protocol supplementary concept word, rare disease supplementary concept word, unique identifier]        |
| 18 | ((("adenosine deaminase" or ADA) adj2 deficien*).mp. [mp=title, abstract, original title, name of substance word, subject heading word, keyword heading word, protocol supplementary concept word, rare disease supplementary concept word, unique identifier] |

|    |                                                                                                                                                                                                                                                            |
|----|------------------------------------------------------------------------------------------------------------------------------------------------------------------------------------------------------------------------------------------------------------|
| 19 | Well-defined syndromes with immunodeficiency.mp. [mp=title, abstract, original title, name of substance word, subject heading word, keyword heading word, protocol supplementary concept word, rare disease supplementary concept word, unique identifier] |
| 20 | Wiskott Aldrich syndrome.mp. [mp=title, abstract, original title, name of substance word, subject heading word, keyword heading word, protocol supplementary concept word, rare disease supplementary concept word, unique identifier]                     |
| 21 | DiGeorge syndrome.mp. [mp=title, abstract, original title, name of substance word, subject heading word, keyword heading word, protocol supplementary concept word, rare disease supplementary concept word, unique identifier]                            |
| 22 | Di George syndrome.mp. [mp=title, abstract, original title, name of substance word, subject heading word, keyword heading word, protocol supplementary concept word, rare disease supplementary concept word, unique identifier]                           |
| 23 | Hyper-IgE syndrome*.mp. [mp=title, abstract, original title, name of substance word, subject heading word, keyword heading word, protocol supplementary concept word, rare disease supplementary concept word, unique identifier]                          |
| 24 | Predominantly antibody deficienc*.mp. [mp=title, abstract, original title, name of substance word, subject heading word, keyword heading word, protocol supplementary concept word, rare disease supplementary concept word, unique identifier]            |
| 25 | common variable immune deficienc*.mp. [mp=title, abstract, original title, name of substance word, subject heading word, keyword heading word, protocol supplementary concept word, rare disease supplementary concept word, unique identifier]            |
| 26 | CVID.mp. [mp=title, abstract, original title, name of substance word, subject heading word, keyword heading word, protocol supplementary concept word, rare disease supplementary concept word, unique identifier]                                         |
| 27 | X-linked agammaglobulin?emia.mp. [mp=title, abstract, original title, name of substance word, subject heading word, keyword heading word, protocol supplementary concept word, rare disease supplementary concept word, unique identifier]                 |
| 28 | XLA.mp. [mp=title, abstract, original title, name of substance word, subject heading word, keyword heading word, protocol supplementary concept word, rare disease supplementary concept word, unique identifier]                                          |

|    |                                                                                                                                                                                                                                                      |
|----|------------------------------------------------------------------------------------------------------------------------------------------------------------------------------------------------------------------------------------------------------|
| 29 | Hyper IgM syndrome*.mp. [mp=title, abstract, original title, name of substance word, subject heading word, keyword heading word, protocol supplementary concept word, rare disease supplementary concept word, unique identifier]                    |
| 30 | IgG subclass deficienc*.mp. [mp=title, abstract, original title, name of substance word, subject heading word, keyword heading word, protocol supplementary concept word, rare disease supplementary concept word, unique identifier]                |
| 31 | IgG sub-class deficienc*.mp. [mp=title, abstract, original title, name of substance word, subject heading word, keyword heading word, protocol supplementary concept word, rare disease supplementary concept word, unique identifier]               |
| 32 | Transient hypogammaglobulin?emia.mp. [mp=title, abstract, original title, name of substance word, subject heading word, keyword heading word, protocol supplementary concept word, rare disease supplementary concept word, unique identifier]       |
| 33 | Diseases of immune dysregulation.mp. [mp=title, abstract, original title, name of substance word, subject heading word, keyword heading word, protocol supplementary concept word, rare disease supplementary concept word, unique identifier]       |
| 34 | immune dysregulation.mp. [mp=title, abstract, original title, name of substance word, subject heading word, keyword heading word, protocol supplementary concept word, rare disease supplementary concept word, unique identifier]                   |
| 35 | Chediak Higashi syndrome.mp. [mp=title, abstract, original title, name of substance word, subject heading word, keyword heading word, protocol supplementary concept word, rare disease supplementary concept word, unique identifier]               |
| 36 | X linked lymphoproliferative syndrome.mp. [mp=title, abstract, original title, name of substance word, subject heading word, keyword heading word, protocol supplementary concept word, rare disease supplementary concept word, unique identifier]  |
| 37 | X linked lympho-proliferative syndrome.mp. [mp=title, abstract, original title, name of substance word, subject heading word, keyword heading word, protocol supplementary concept word, rare disease supplementary concept word, unique identifier] |
| 38 | XLP.mp. [mp=title, abstract, original title, name of substance word, subject heading word, keyword heading word, protocol supplementary concept word, rare disease supplementary concept word, unique identifier]                                    |

|    |                                                                                                                                                                                                                                                        |
|----|--------------------------------------------------------------------------------------------------------------------------------------------------------------------------------------------------------------------------------------------------------|
| 39 | Congenital defect* of phagocyte number.mp. [mp=title, abstract, original title, name of substance word, subject heading word, keyword heading word, protocol supplementary concept word, rare disease supplementary concept word, unique identifier]   |
| 40 | Congenital defect* of phagocyte function.mp. [mp=title, abstract, original title, name of substance word, subject heading word, keyword heading word, protocol supplementary concept word, rare disease supplementary concept word, unique identifier] |
| 41 | chronic granulomatous disorder.mp. [mp=title, abstract, original title, name of substance word, subject heading word, keyword heading word, protocol supplementary concept word, rare disease supplementary concept word, unique identifier]           |
| 42 | CGD.mp. [mp=title, abstract, original title, name of substance word, subject heading word, keyword heading word, protocol supplementary concept word, rare disease supplementary concept word, unique identifier]                                      |
| 43 | barth syndrome.mp. [mp=title, abstract, original title, name of substance word, subject heading word, keyword heading word, protocol supplementary concept word, rare disease supplementary concept word, unique identifier]                           |
| 44 | defect* in innate immunity.mp. [mp=title, abstract, original title, name of substance word, subject heading word, keyword heading word, protocol supplementary concept word, rare disease supplementary concept word, unique identifier]               |
| 45 | nemo deficiency.mp. [mp=title, abstract, original title, name of substance word, subject heading word, keyword heading word, protocol supplementary concept word, rare disease supplementary concept word, unique identifier]                          |
| 46 | Autoinflammatory disorder*.mp. [mp=title, abstract, original title, name of substance word, subject heading word, keyword heading word, protocol supplementary concept word, rare disease supplementary concept word, unique identifier]               |
| 47 | Auto-inflammatory disorder*.mp. [mp=title, abstract, original title, name of substance word, subject heading word, keyword heading word, protocol supplementary concept word, rare disease supplementary concept word, unique identifier]              |
| 48 | Muckle Wells syndrome.mp. [mp=title, abstract, original title, name of substance word, subject heading word, keyword heading word, protocol supplementary concept word, rare disease supplementary concept word, unique identifier]                    |

|    |                                                                                                                                                                                                                                                                                                 |
|----|-------------------------------------------------------------------------------------------------------------------------------------------------------------------------------------------------------------------------------------------------------------------------------------------------|
| 49 | Blau syndrome.mp. [mp=title, abstract, original title, name of substance word, subject heading word, keyword heading word, protocol supplementary concept word, rare disease supplementary concept word, unique identifier]                                                                     |
| 50 | Complement deficienc*.mp. [mp=title, abstract, original title, name of substance word, subject heading word, keyword heading word, protocol supplementary concept word, rare disease supplementary concept word, unique identifier]                                                             |
| 51 | 1 or 2 or 3 or 4 or 5 or 6 or 7 or 8 or 9 or 10 or 11 or 12 or 13 or 14 or 15 or 16 or 17 or 18 or 19 or 20 or 21 or 22 or 23 or 24 or 25 or 26 or 27 or 28 or 29 or 30 or 31 or 32 or 33 or 34 or 35 or 36 or 37 or 38 or 39 or 40 or 41 or 42 or 43 or 44 or 45 or 46 or 47 or 48 or 49 or 50 |
| 52 | exp Immunoglobulins/ad, ae, ct, tu [Administration & Dosage, Adverse Effects, Contraindications, Therapeutic Use]                                                                                                                                                                               |
| 53 | IVIg.mp. [mp=title, abstract, original title, name of substance word, subject heading word, keyword heading word, protocol supplementary concept word, rare disease supplementary concept word, unique identifier]                                                                              |
| 54 | SCIg.mp. [mp=title, abstract, original title, name of substance word, subject heading word, keyword heading word, protocol supplementary concept word, rare disease supplementary concept word, unique identifier]                                                                              |
| 55 | ((immunoglobulin* or IG) adj3 (replac* or therap* or donation* or donor* or infus* or intraven* or intra-ven* or subcutane* or sub-cutane* or dose* or dosage* or infus* or administ* or treatment* or immunomodulat*)).mp.                                                                     |
| 56 | 52 or 53 or 54 or 55                                                                                                                                                                                                                                                                            |
| 57 | health related quality of life.tw.                                                                                                                                                                                                                                                              |
| 58 | health related qol.tw.                                                                                                                                                                                                                                                                          |
| 59 | health related ql.tw.                                                                                                                                                                                                                                                                           |
| 60 | hrqol.tw.                                                                                                                                                                                                                                                                                       |
| 61 | hql.tw.                                                                                                                                                                                                                                                                                         |
| 62 | health state utilit\$.tw.                                                                                                                                                                                                                                                                       |
| 63 | hsuv\$.tw.                                                                                                                                                                                                                                                                                      |

|    |                                                                                                                                                                                       |
|----|---------------------------------------------------------------------------------------------------------------------------------------------------------------------------------------|
| 64 | (euroqol or euro qol or eq5d or eq 5d).tw.                                                                                                                                            |
| 65 | (sf6d or sf 6d or sf 6 dimension\$ or sf six dimension\$ or shortform 6d or shortform six dimension\$ or short form 6d or short form 6 dimension\$ or short form six dimension\$).tw. |
| 66 | (sf12 or sf 12 or short form 12 or shortform 12 or sf twelve or sftwelve or shortform twelve or short form twelve).tw.                                                                |
| 67 | (sf36 or sf 36 or short form 36 or shortform 36 or sf thirtysix or sf thirty six or shortform thirtysix or shortform thirty six or short form thirtysix or short form thirty six).tw. |
| 68 | (item adj3 short form).tw.                                                                                                                                                            |
| 69 | (item adj3 shortform).tw.                                                                                                                                                             |
| 70 | medical outcomes survey.tw.                                                                                                                                                           |
| 71 | medical outcomes study.tw.                                                                                                                                                            |
| 72 | mos.tw.                                                                                                                                                                               |
| 73 | psychological general wellbeing index.tw.                                                                                                                                             |
| 74 | psychological general well being index.tw.                                                                                                                                            |
| 75 | pgwb\$.tw.                                                                                                                                                                            |
| 76 | health utilit\$.tw.                                                                                                                                                                   |
| 77 | hui\$.tw.                                                                                                                                                                             |
| 78 | quality of wellbeing.tw.                                                                                                                                                              |
| 79 | quality of well being.tw.                                                                                                                                                             |
| 80 | qwb\$.tw.                                                                                                                                                                             |
| 81 | rosser.tw.                                                                                                                                                                            |
| 82 | trade off\$.tw.                                                                                                                                                                       |
| 83 | standard gamble\$.tw.                                                                                                                                                                 |
| 84 | tto\$.tw.                                                                                                                                                                             |

|     |                                                                                                                                                                                                                                                                                                                                                                                    |
|-----|------------------------------------------------------------------------------------------------------------------------------------------------------------------------------------------------------------------------------------------------------------------------------------------------------------------------------------------------------------------------------------|
| 85  | qaly\$.tw.                                                                                                                                                                                                                                                                                                                                                                         |
| 86  | quality adjusted life year\$.tw.                                                                                                                                                                                                                                                                                                                                                   |
| 87  | quality-adjusted life years/                                                                                                                                                                                                                                                                                                                                                       |
| 88  | hye\$.tw.                                                                                                                                                                                                                                                                                                                                                                          |
| 89  | health\$ year\$ equivalent\$.tw.                                                                                                                                                                                                                                                                                                                                                   |
| 90  | disutilit\$.tw.                                                                                                                                                                                                                                                                                                                                                                    |
| 91  | disbenefit\$.tw.                                                                                                                                                                                                                                                                                                                                                                   |
| 92  | "Quality of Life"/                                                                                                                                                                                                                                                                                                                                                                 |
| 93  | "Outcome Assessment (Health Care)"/                                                                                                                                                                                                                                                                                                                                                |
| 94  | quality of life.tw.                                                                                                                                                                                                                                                                                                                                                                |
| 95  | 92 or 93 or 94                                                                                                                                                                                                                                                                                                                                                                     |
| 96  | (preference based or utilit\$ or generic preference).tw.                                                                                                                                                                                                                                                                                                                           |
| 97  | 95 and 96                                                                                                                                                                                                                                                                                                                                                                          |
| 98  | (preference\$ adj2 (elicit\$ or patient\$ or population\$ or measure\$ or based or cost\$)).tw.                                                                                                                                                                                                                                                                                    |
| 99  | (utilit\$ adj2 (elicit\$ or patient\$ or population\$ or measure\$ or based or cost\$)).tw.                                                                                                                                                                                                                                                                                        |
| 100 | or/57-91                                                                                                                                                                                                                                                                                                                                                                           |
| 101 | 97 or 98 or 99 or 100                                                                                                                                                                                                                                                                                                                                                              |
| 102 | (burden* adj2 (treat* or therap*)).mp. [mp=title, abstract, original title, name of substance word, subject heading word, keyword heading word, protocol supplementary concept word, rare disease supplementary concept word, unique identifier]                                                                                                                                   |
| 103 | activities of daily living/ or health behavior/ or health, knowledge, attitudes, practice/ or lifestyle/ or occupational therapy/ or palliat*.mp. or patient education as topic/ or exp rehabilitation/ or exp physical therapy modalities/ or self care/ or barthel*.mp. [mp=title, abstract, original title, name of substance word, subject heading word, keyword heading word, |



|     |                                                                                                                                                                                                                                                                                                                                                                                               |
|-----|-----------------------------------------------------------------------------------------------------------------------------------------------------------------------------------------------------------------------------------------------------------------------------------------------------------------------------------------------------------------------------------------------|
|     | protocol supplementary concept word, rare disease supplementary concept word, unique identifier]                                                                                                                                                                                                                                                                                              |
| 104 | Disabled Persons/ or Disability Evaluation/ or work capacity evaluation/ or functional disability.mp.                                                                                                                                                                                                                                                                                         |
| 105 | social support/ or exp family/px or exercise/ or "physical education and training"/ or physical endurance/ or fatigue/ or physical fitness/ or long term care/                                                                                                                                                                                                                                |
| 106 | exp Gait/ or exp Gait Disorders, Neurologic/ or exp Accidental Falls/                                                                                                                                                                                                                                                                                                                         |
| 107 | self administration/ or (treatment adj3 (regimen* or regime* or tasks or work)).mp. or unnecessary*.mp. or unmet.mp.                                                                                                                                                                                                                                                                          |
| 108 | exp cognition disorders/ or independen*.mp. or dependenc*.mp. or socioeconomic factors/ or life change events/                                                                                                                                                                                                                                                                                |
| 109 | or/103-108                                                                                                                                                                                                                                                                                                                                                                                    |
| 110 | travel*.mp. or automobile driving/ or mobility limitation/ or transportation/                                                                                                                                                                                                                                                                                                                 |
| 111 | (recover* or challeng* or goal*).mp.                                                                                                                                                                                                                                                                                                                                                          |
| 112 | interpersonal relations/ or social isolation/ or cost of illness/ or schedul*.mp.                                                                                                                                                                                                                                                                                                             |
| 113 | or/110-112                                                                                                                                                                                                                                                                                                                                                                                    |
| 114 | 109 and 113                                                                                                                                                                                                                                                                                                                                                                                   |
| 115 | adaptation, psychological/ or adheren*.mp. or nonadheren*.mp. or patient compliance/ or noncomplan*.mp. or inconvenien*.mp. or negotiat*.mp. or (patient adj2 (care or experience or understand* or expectation* or perspective*)).mp. or patient satisfaction/ or personal autonomy/ or physician-patient relations/ or professional-patient relations/ or dissatis*.mp. or quality of life/ |
| 116 | self concept/ or self care/ or self-management/ or suffer*.mp.                                                                                                                                                                                                                                                                                                                                |
| 117 | attitude/ or attitude to health/                                                                                                                                                                                                                                                                                                                                                              |
| 118 | 115 or 116 or 117                                                                                                                                                                                                                                                                                                                                                                             |
| 119 | 109 and 118                                                                                                                                                                                                                                                                                                                                                                                   |

|     |                                                                                         |
|-----|-----------------------------------------------------------------------------------------|
| 120 | 109 and (exp leisure activities/ or health status/ or well-being.mp.)                   |
| 121 | 109 and (Health Services Accessibility/ or continuity of patient care/ or disrupt*.mp.) |
| 122 | sickness impact profile/                                                                |
| 123 | needs assessment/ and burden*.mp.                                                       |
| 124 | 102 or 114 or 119 or 120 or 121 or 122 or 123                                           |
| 125 | 51 and 56 and 101                                                                       |
| 126 | 51 and 56 and 124                                                                       |
| 127 | 51 and 101                                                                              |
| 128 | 56 and 124                                                                              |
| 129 | 125 or 126 or 127 or 128                                                                |
